# Supplementary material for: Predator stress-induced depression is associated with inhibition of hippocampal neurogenesis in adult male mice
Source: PubMed Central journal article supplement — Neural Regen Res. 2019 Feb;14(2):298–305. doi: 10.4103/1673-5374.244792 (PMC6301170; doi:10.4103/1673-5374.244792), 2019-02
Supplement: NRR-14-298_Suppl1.pdf [file NRR-14-298_Suppl1.pdf]

## ADDITONAL FILE

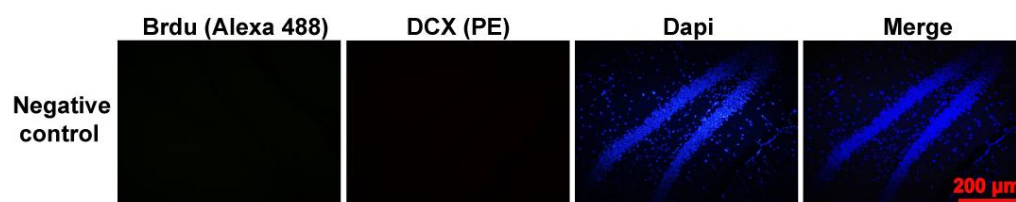**Supplemental Figure S1 Negative control in double immunostaining of BrdU/DCX in dentate gyrus.**

Section was incubated without primary antibody but with secondary antibodies as the negative control. DNA in nucleus was stained by incubating dapi (50  $\mu\text{g}/\text{mL}$ ) for 5 min. Sections were mounted using anti-fade mounting medium, and photographed by an inverted fluorescence microscope.
